# Supplementary material for: The assessment of cadmium, chromium, copper, and nickel tolerance and bioaccumulation by shrub plant Tetraena qataranse
Source: PubMed Central journal article supplement (PMC6449511; doi:10.1038/s41598-019-42029-9), 2019-04-04
Supplement: 41598_2019_42029_MOESM1_ESM.pdf [file 41598_2019_42029_MOESM1_ESM.pdf]

# The assessment of cadmium, chromium, copper, and nickel tolerance and bioaccumulation by shrub plant *Tetraena qataranse*

Kamal Usman<sup>1</sup>, Mohammad A. Al-Ghouti<sup>1</sup>, Mohammed H. Abu-Dieyeh\*<sup>1</sup>

<sup>1</sup>Department of Biological & Environmental Sciences, College of Arts & Sciences, Qatar University, Doha, Qatar.

\*dandelion@qu.edu.qa

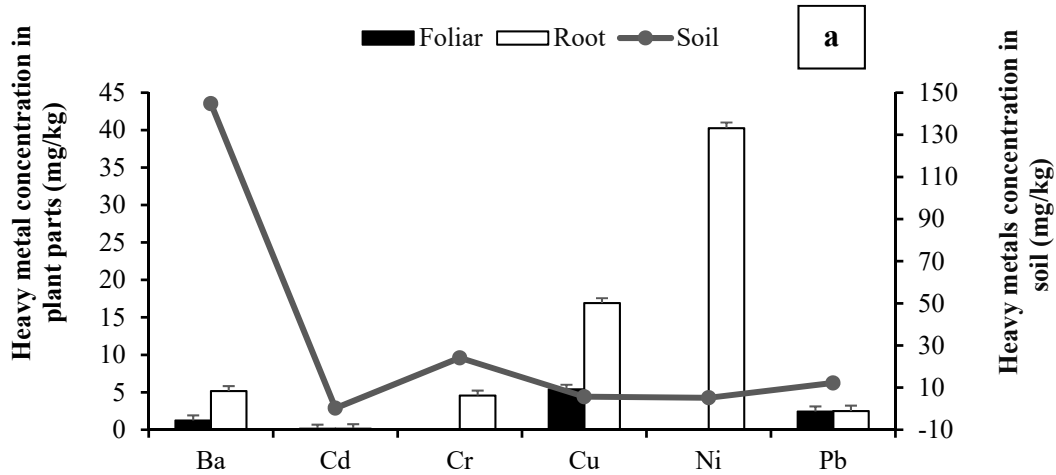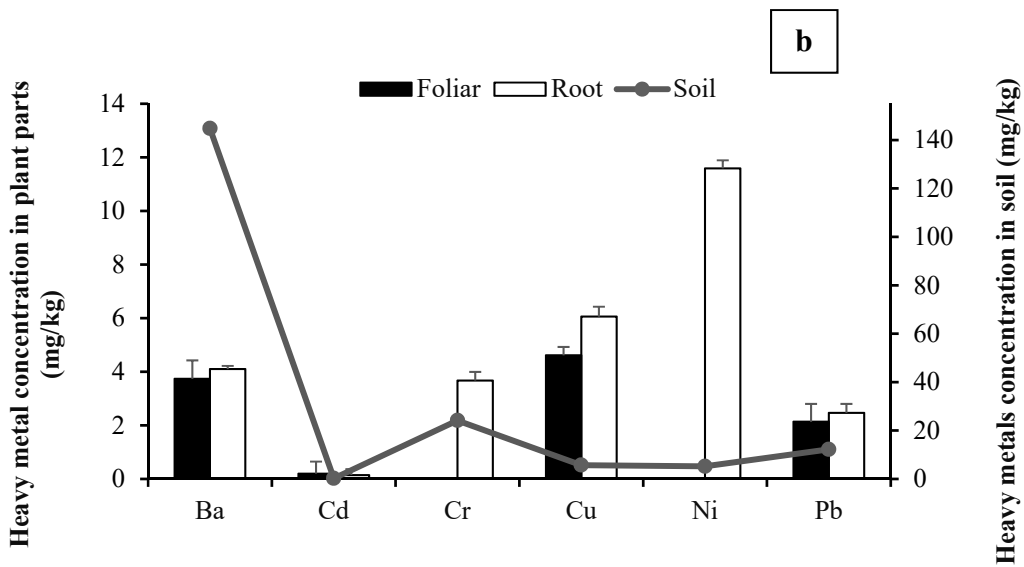

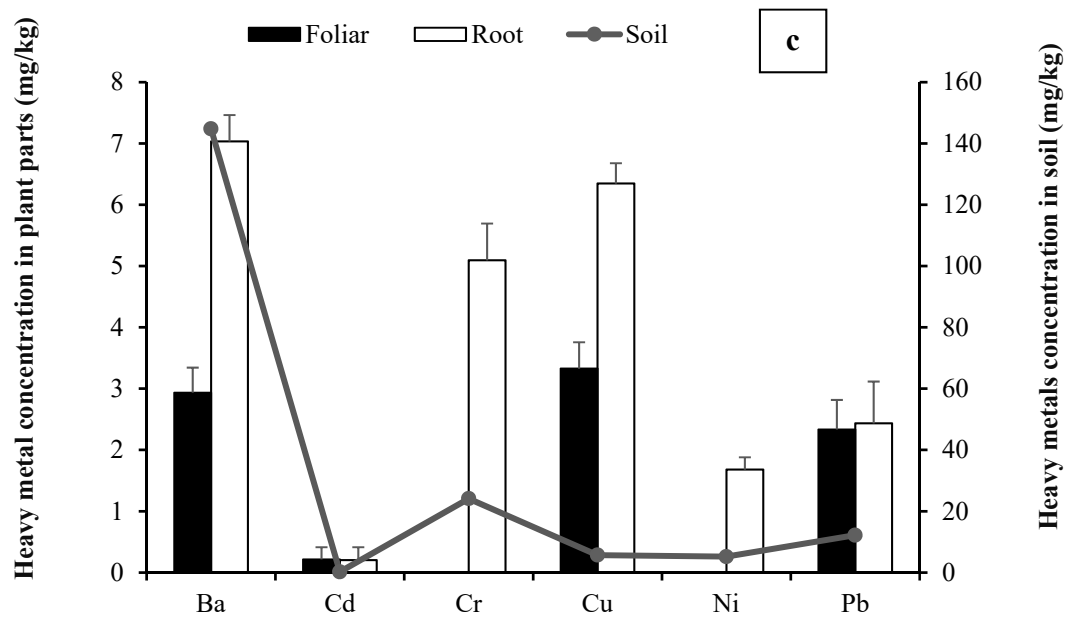

**Supplementary Figure S1.** Heavy metals concentration in the soil, root and shoot of (a) *Sueada aegyptiaca* (b) *Salsola vermiculata* and (c) *Limonium axillare*. Mean concentration of metals are averages of five replicates (n=5)  $\pm$  SEM at  $P < 0.05$  level.
